# Supplementary material for: Dengue and chikungunya virus loads in the mosquito Aedes aegypti are determined by distinct genetic architectures
Source: PubMed Central journal article supplement (PMC10124881; doi:10.1371/journal.ppat.1011307), 2023-04-12

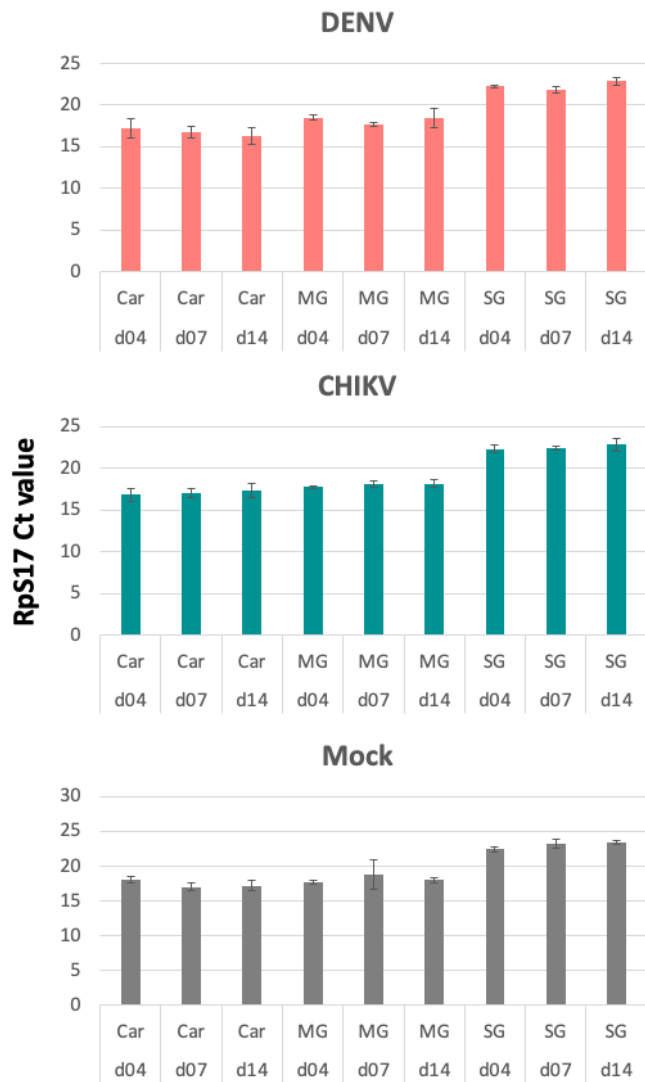

Supplement: ppat.1011307.s001.pdf [file ppat.1011307.s001.pdf]
